# Supplementary material for: Polyadenine-mediated aptamer-conjugated gold nanoparticles for the detection of interleukin-6
Source: Royal Society of Chemistry journal article supplement (doi:10.1039/d5ay01582k), 2025-12-15
Supplement: d5ay01582k1.pdf [file d5ay01582k1.pdf]

## Polyadenine-mediated aptamer conjugated gold nanoparticles for detection of interleukin-6

Yu Huang <sup>a,b,#,\*</sup>, Rui Liu <sup>a,b,#</sup>, Chin-Jung Chuang <sup>c</sup>, Linhao Jiang <sup>d</sup>, Qiongyuan Zhang <sup>e</sup>,  
Jiangling Wu <sup>e</sup>, Zhiguo Wu <sup>f</sup>, Weiguang Yang <sup>f</sup>, Qianye Zhang <sup>f</sup>, Yuyan Sun <sup>a,b</sup>, Ling  
Pan <sup>g</sup>, Dongmei Liu <sup>h,\*</sup>, Yue Li <sup>i,\*</sup>, Xing Chen <sup>j</sup>, Lei Feng <sup>a,b,\*</sup>, Hua Zhang <sup>a,b,k</sup>, Kaiji Xie  
<sup>a,b</sup>

<sup>a</sup> Center of Super-Resolution Optics and Chongqing Engineering Research Center of  
High-Resolution and Three-Dimensional Dynamic Imaging Technology, Chongqing  
Institute of Green and Intelligent Technology, Chinese Academy of Sciences,  
Chongqing, 400714, China

<sup>b</sup> Chongqing School, University of Chinese Academy of Sciences, Chongqing, 400714,  
China

<sup>c</sup> Department of Opto-Electronic Engineering, National Dong Hwa University, Hualien  
97401, Taiwan, China

<sup>d</sup> Shapingba Community Health Service Center, Shapingba District, Chongqing,  
400030, China

<sup>e</sup> Department of Clinical Laboratory and Medical Sciences Research Center,  
University-Town Hospital of Chongqing Medical University, Chongqing, 401331,  
China

<sup>f</sup> Wuhan Newfiber Optics Electron Co.,LTD, No. 303 Guanggu Avenue, Wuhan East  
Lake High-tech Development Zone, Wuhan, 430075, Hubei province, China

<sup>g</sup> Hubei Microfluidic Technology Co.,Ltd, Huarong District, Ezhou, 436031 , Hubei  
province, China

<sup>h</sup> Department of Thoracic Surgery, University-Town Hospital of Chongqing Medical  
University, Chongqing, 401331, China

<sup>i</sup> Department of Laboratory Medicine, The Second Affiliated Hospital of Chongqing  
Medical University, Chongqing, 400010, China

<sup>j</sup> Institute of Industry and Equipment Technology, Hefei University of Technology,

Hefei, 230009, China

k Chongqing University, No. 174 Shazheng Street, Shapingba, Chongqing 400044,  
China

# These authors contributed equally to this work

\*Corresponding author email address: [huangyu@cigit.ac.cn](mailto:huangyu@cigit.ac.cn) (Yu Huang),  
[liudongmei@hospital.cqmu.edu.cn](mailto:liudongmei@hospital.cqmu.edu.cn) (Dongmei Liu), [liyuesun2004@163.com](mailto:liyuesun2004@163.com) (Yue Li),  
[fenglei@cigit.ac.cn](mailto:fenglei@cigit.ac.cn) (Lei Feng)

Table S1 Resonance wavelength of AuNPs prepared at five batches

| Batch number | Resonance wavelength before functionalization (nm) | Resonance wavelength after functionalization (nm) |
|--------------|----------------------------------------------------|---------------------------------------------------|
| 1            | 521.05                                             | 527.15                                            |
| 2            | 518.85                                             | 523.65                                            |
| 3            | 521.23                                             | 527.73                                            |
| 4            | 523.52                                             | 530.73                                            |
| 5            | 519.65                                             | 523.47                                            |
| mean         | 520.86                                             | 526.54                                            |
| sd           | 1.78                                               | 3.04                                              |
| CV%          | 0.34%                                              | 0.58%                                             |

sd : Standard deviation; CV%: Coefficient of variation

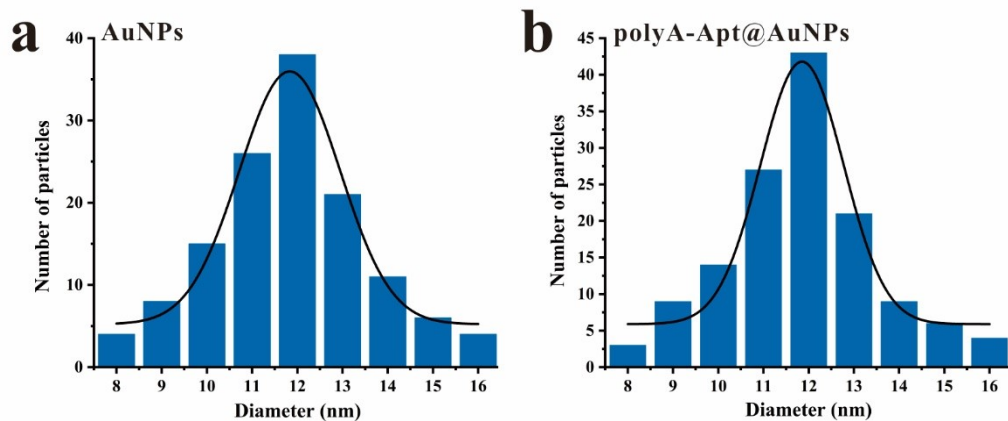

Fig. S1. Size distribution of (a) AuNPs and (b) polyA-Apt@AuNPs

Table S2 Specificity test results for 4 proteins and their mixture

| Number | $A_{650}/A_{520}$<br>for IL-<br>4(a.u.) | $A_{650}/A_{520}$<br>for IL-<br>8(a.u.) | $A_{650}/A_{520}$<br>for IL-<br>10(a.u.) | $A_{650}/A_{520}$<br>for IL-<br>6(a.u.) | $A_{650}/A_{520}$ for<br>Mixture(a.u.) |
|--------|-----------------------------------------|-----------------------------------------|------------------------------------------|-----------------------------------------|----------------------------------------|
| 1      | 1.326                                   | 1.289                                   | 1.258                                    | 0.458                                   | 0.526                                  |
| 2      | 1.458                                   | 1.268                                   | 1.396                                    | 0.536                                   | 0.415                                  |
| 3      | 1.526                                   | 1.402                                   | 1.355                                    | 0.562                                   | 0.436                                  |
| 4      | 1.352                                   | 1.354                                   | 1.205                                    | 0.478                                   | 0.562                                  |
| 5      | 1.402                                   | 1.315                                   | 1.342                                    | 0.496                                   | 0.496                                  |
| mean   | 1.412                                   | 1.326                                   | 1.311                                    | 0.506                                   | 0.487                                  |
| sd     | 0.081                                   | 0.053                                   | 0.077                                    | 0.043                                   | 0.061                                  |
| RSD(%) | 5.7                                     | 4.0                                     | 5.8                                      | 8.3                                     | 12.5                                   |

sd : Standard deviation; RSD: Relative standard deviation
